# Supplementary material
Source: PubMed Central journal article supplement (PMC8843031)

Oligodendrocytes

Excitatory Neurons

Astrocytes

Microglia

OPC

Inhibitory Neurons

Endothelial cells  
VLMC

Expression

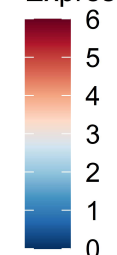

Identity

- Oligodendrocytes
- Excitatory Neurons
- Astrocytes
- Microglia
- OPC
- Inhibitory Neurons
- Endothelial cells
- VLMC

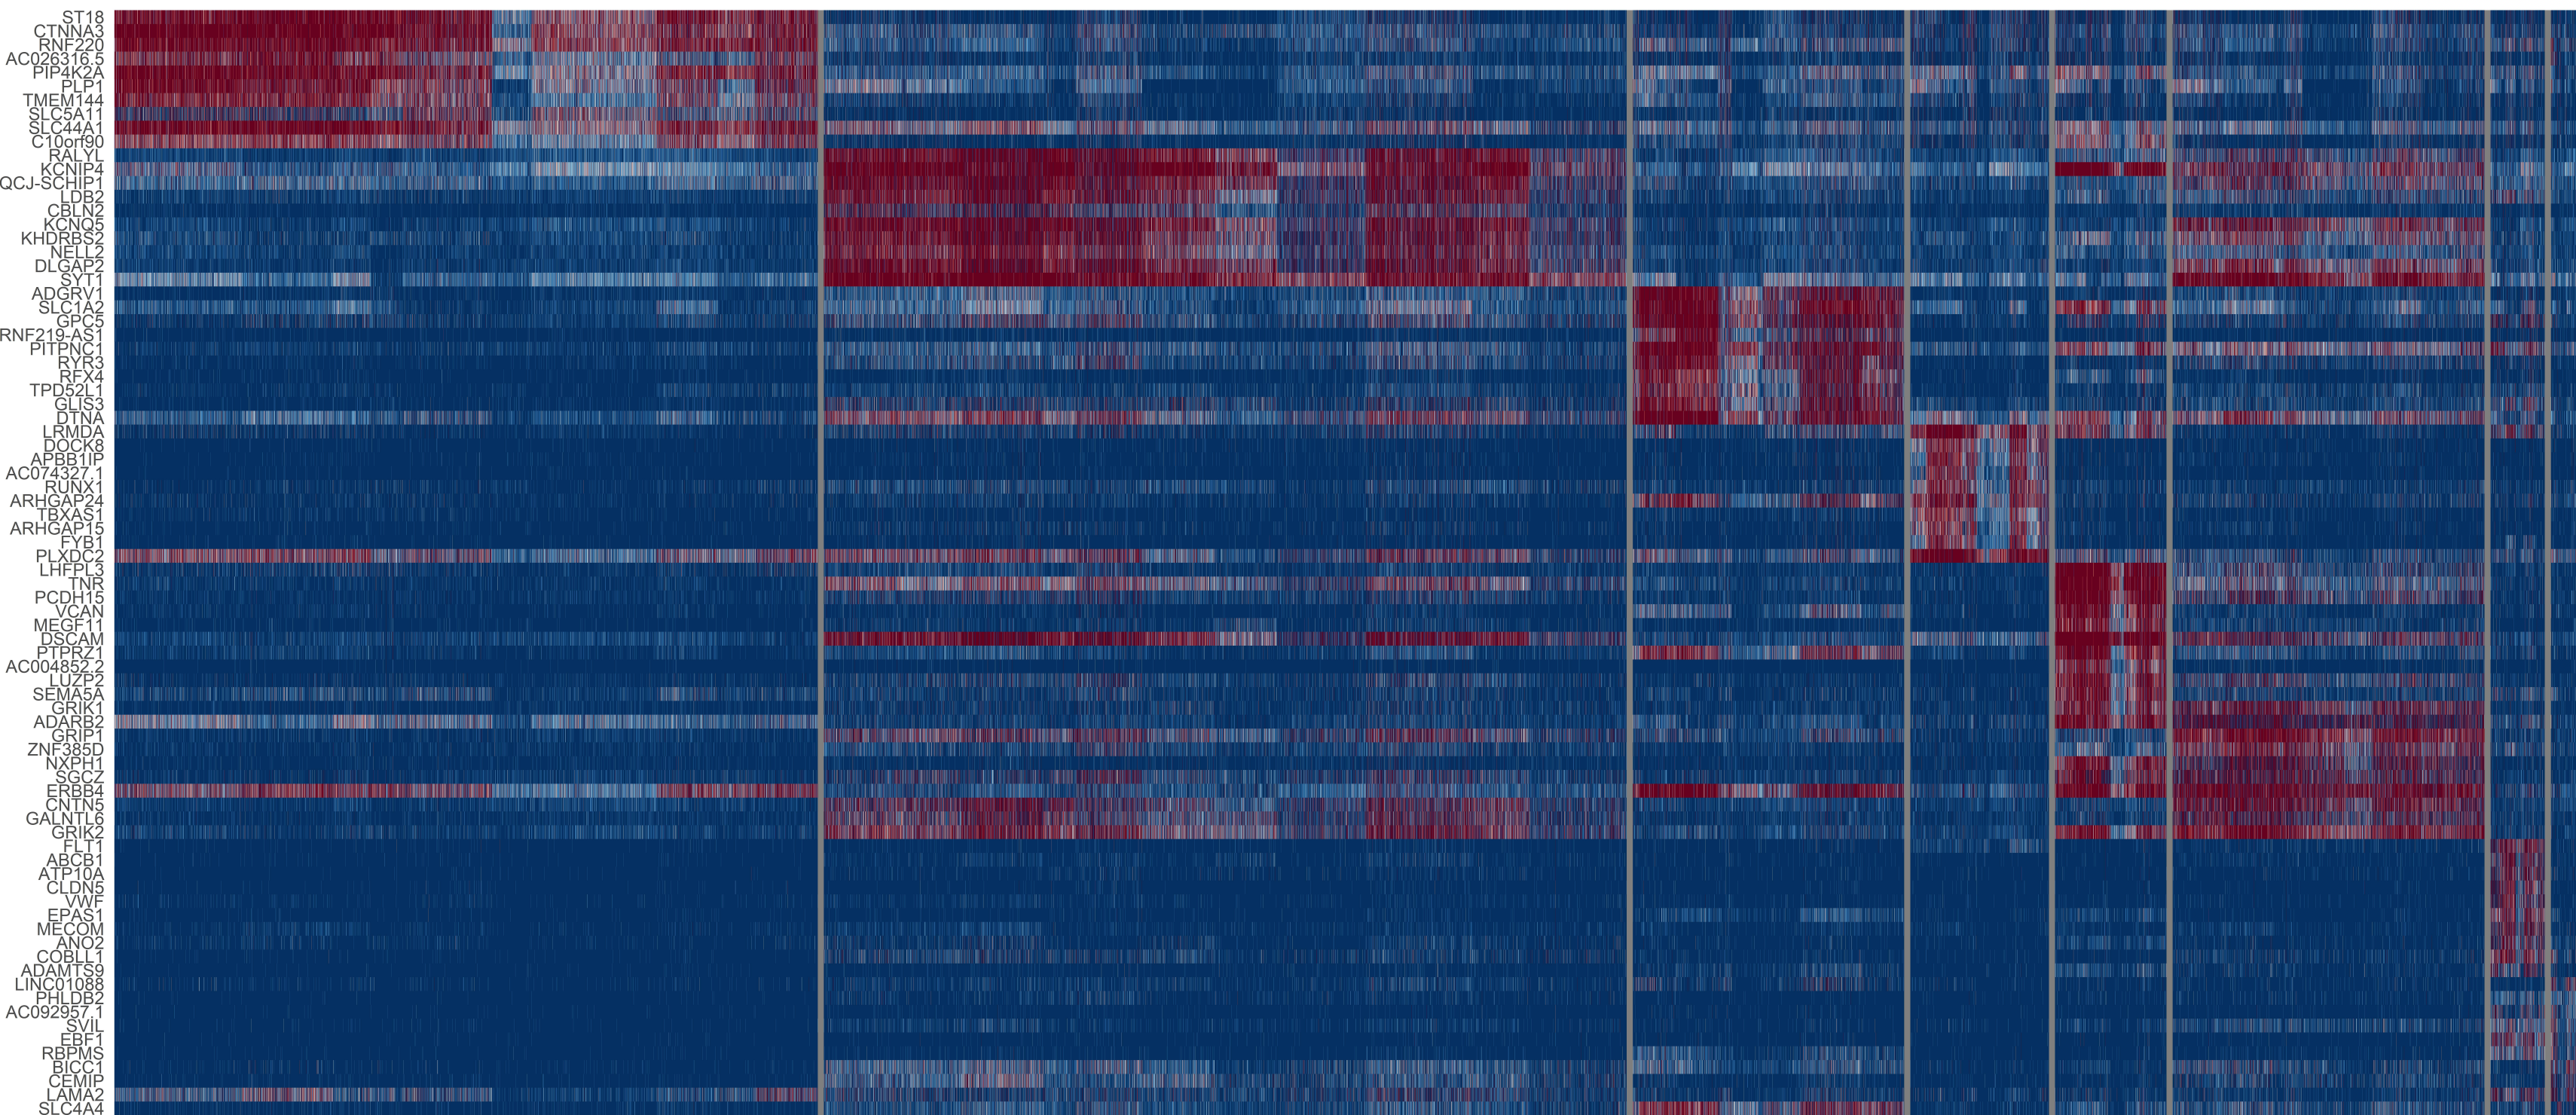

Supplement: NIHMS1657410-supplement-FIG_S3.pdf [file NIHMS1657410-supplement-FIG_S3.pdf]
