# Supplementary material
Source: PubMed Central journal article supplement (PMC8843031)

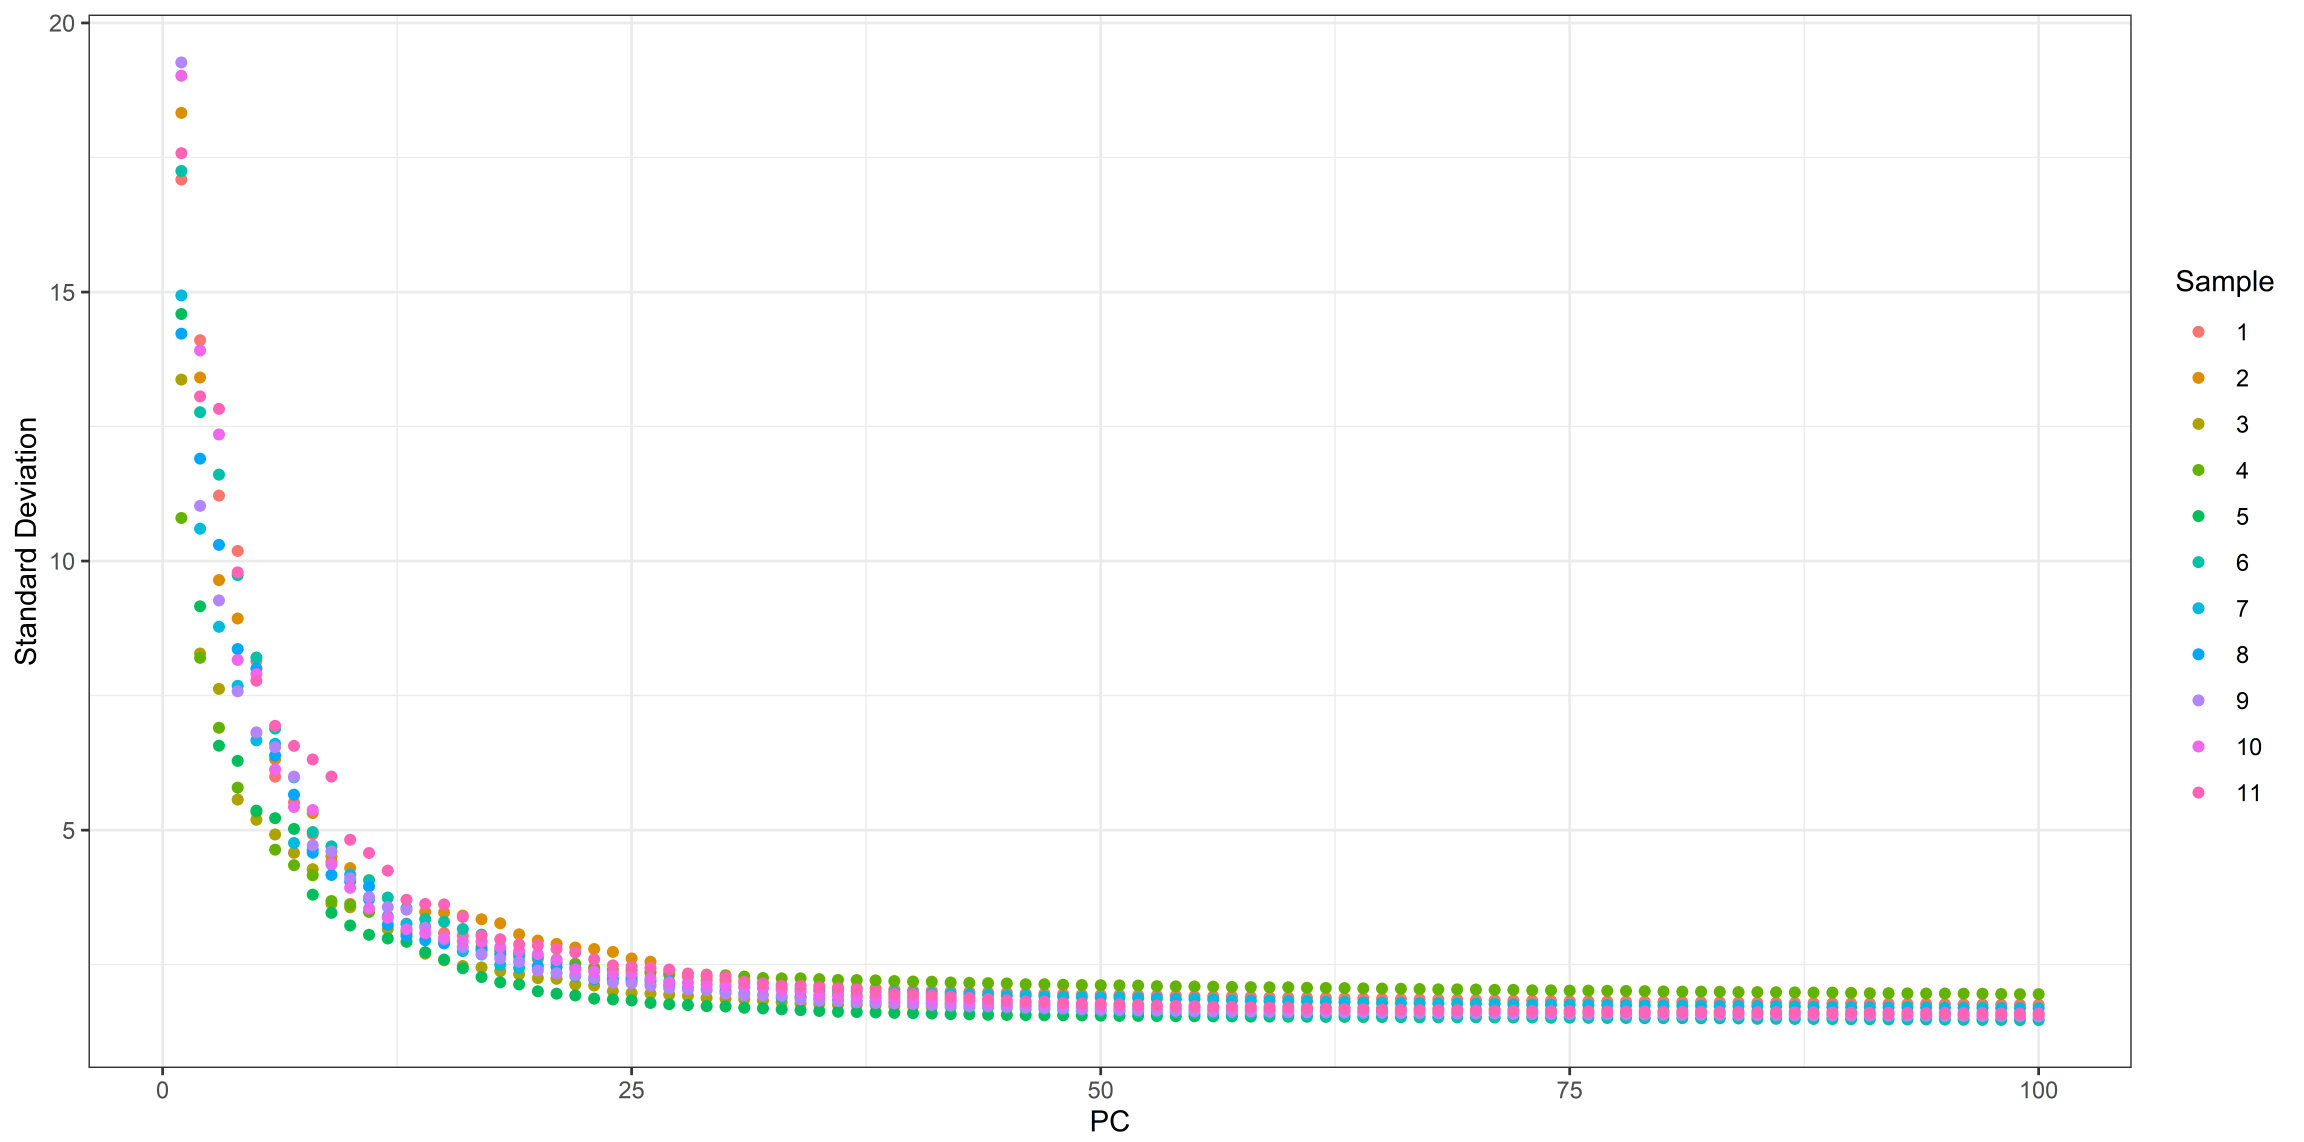

Supplement: NIHMS1657410-supplement-FIG_S1.pdf [file NIHMS1657410-supplement-FIG_S1.pdf]

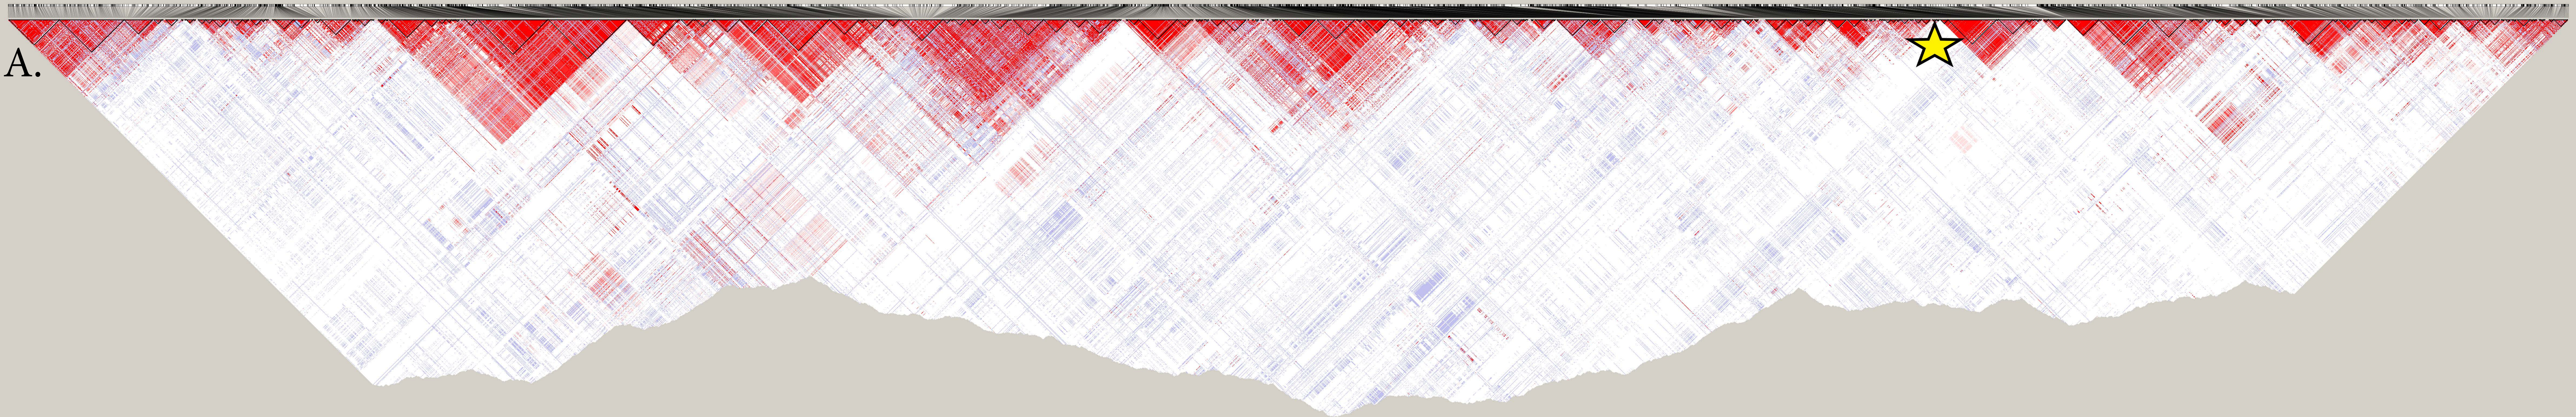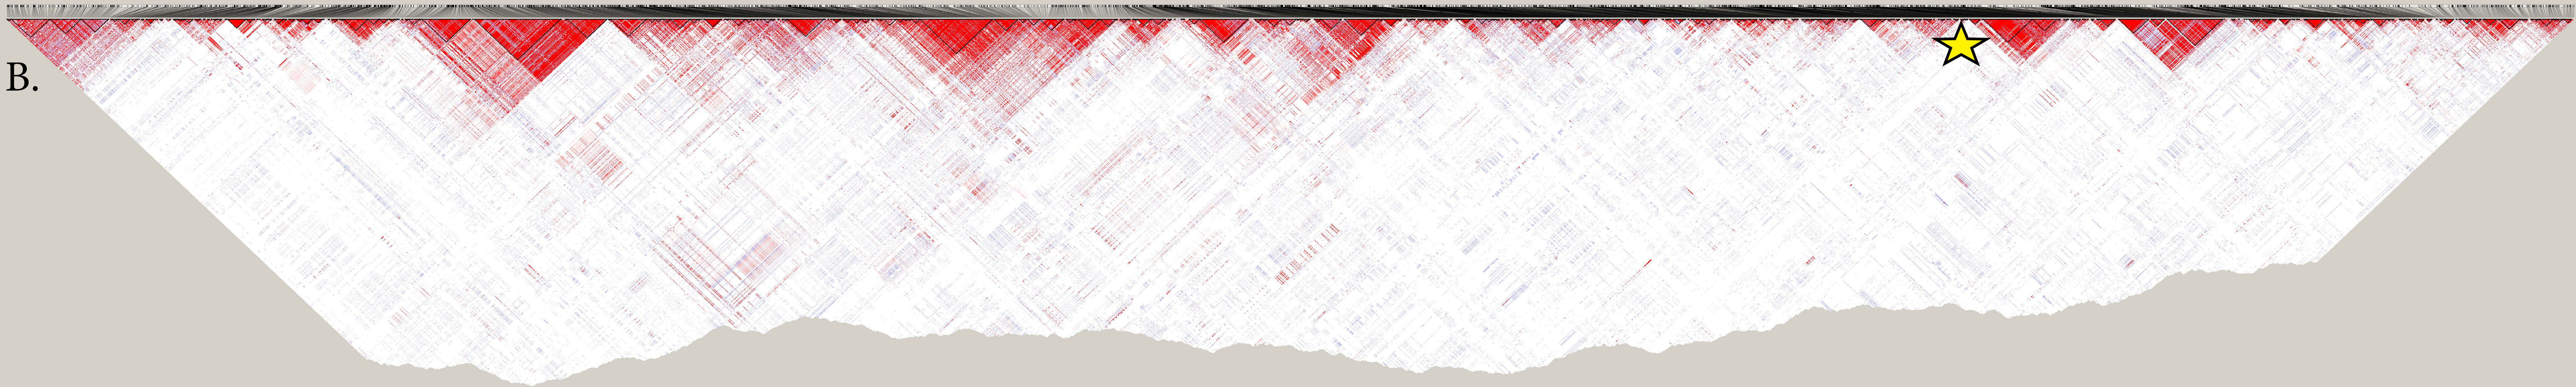

Supplement: NIHMS1657410-supplement-FIG_S2.pdf [file NIHMS1657410-supplement-FIG_S2.pdf]

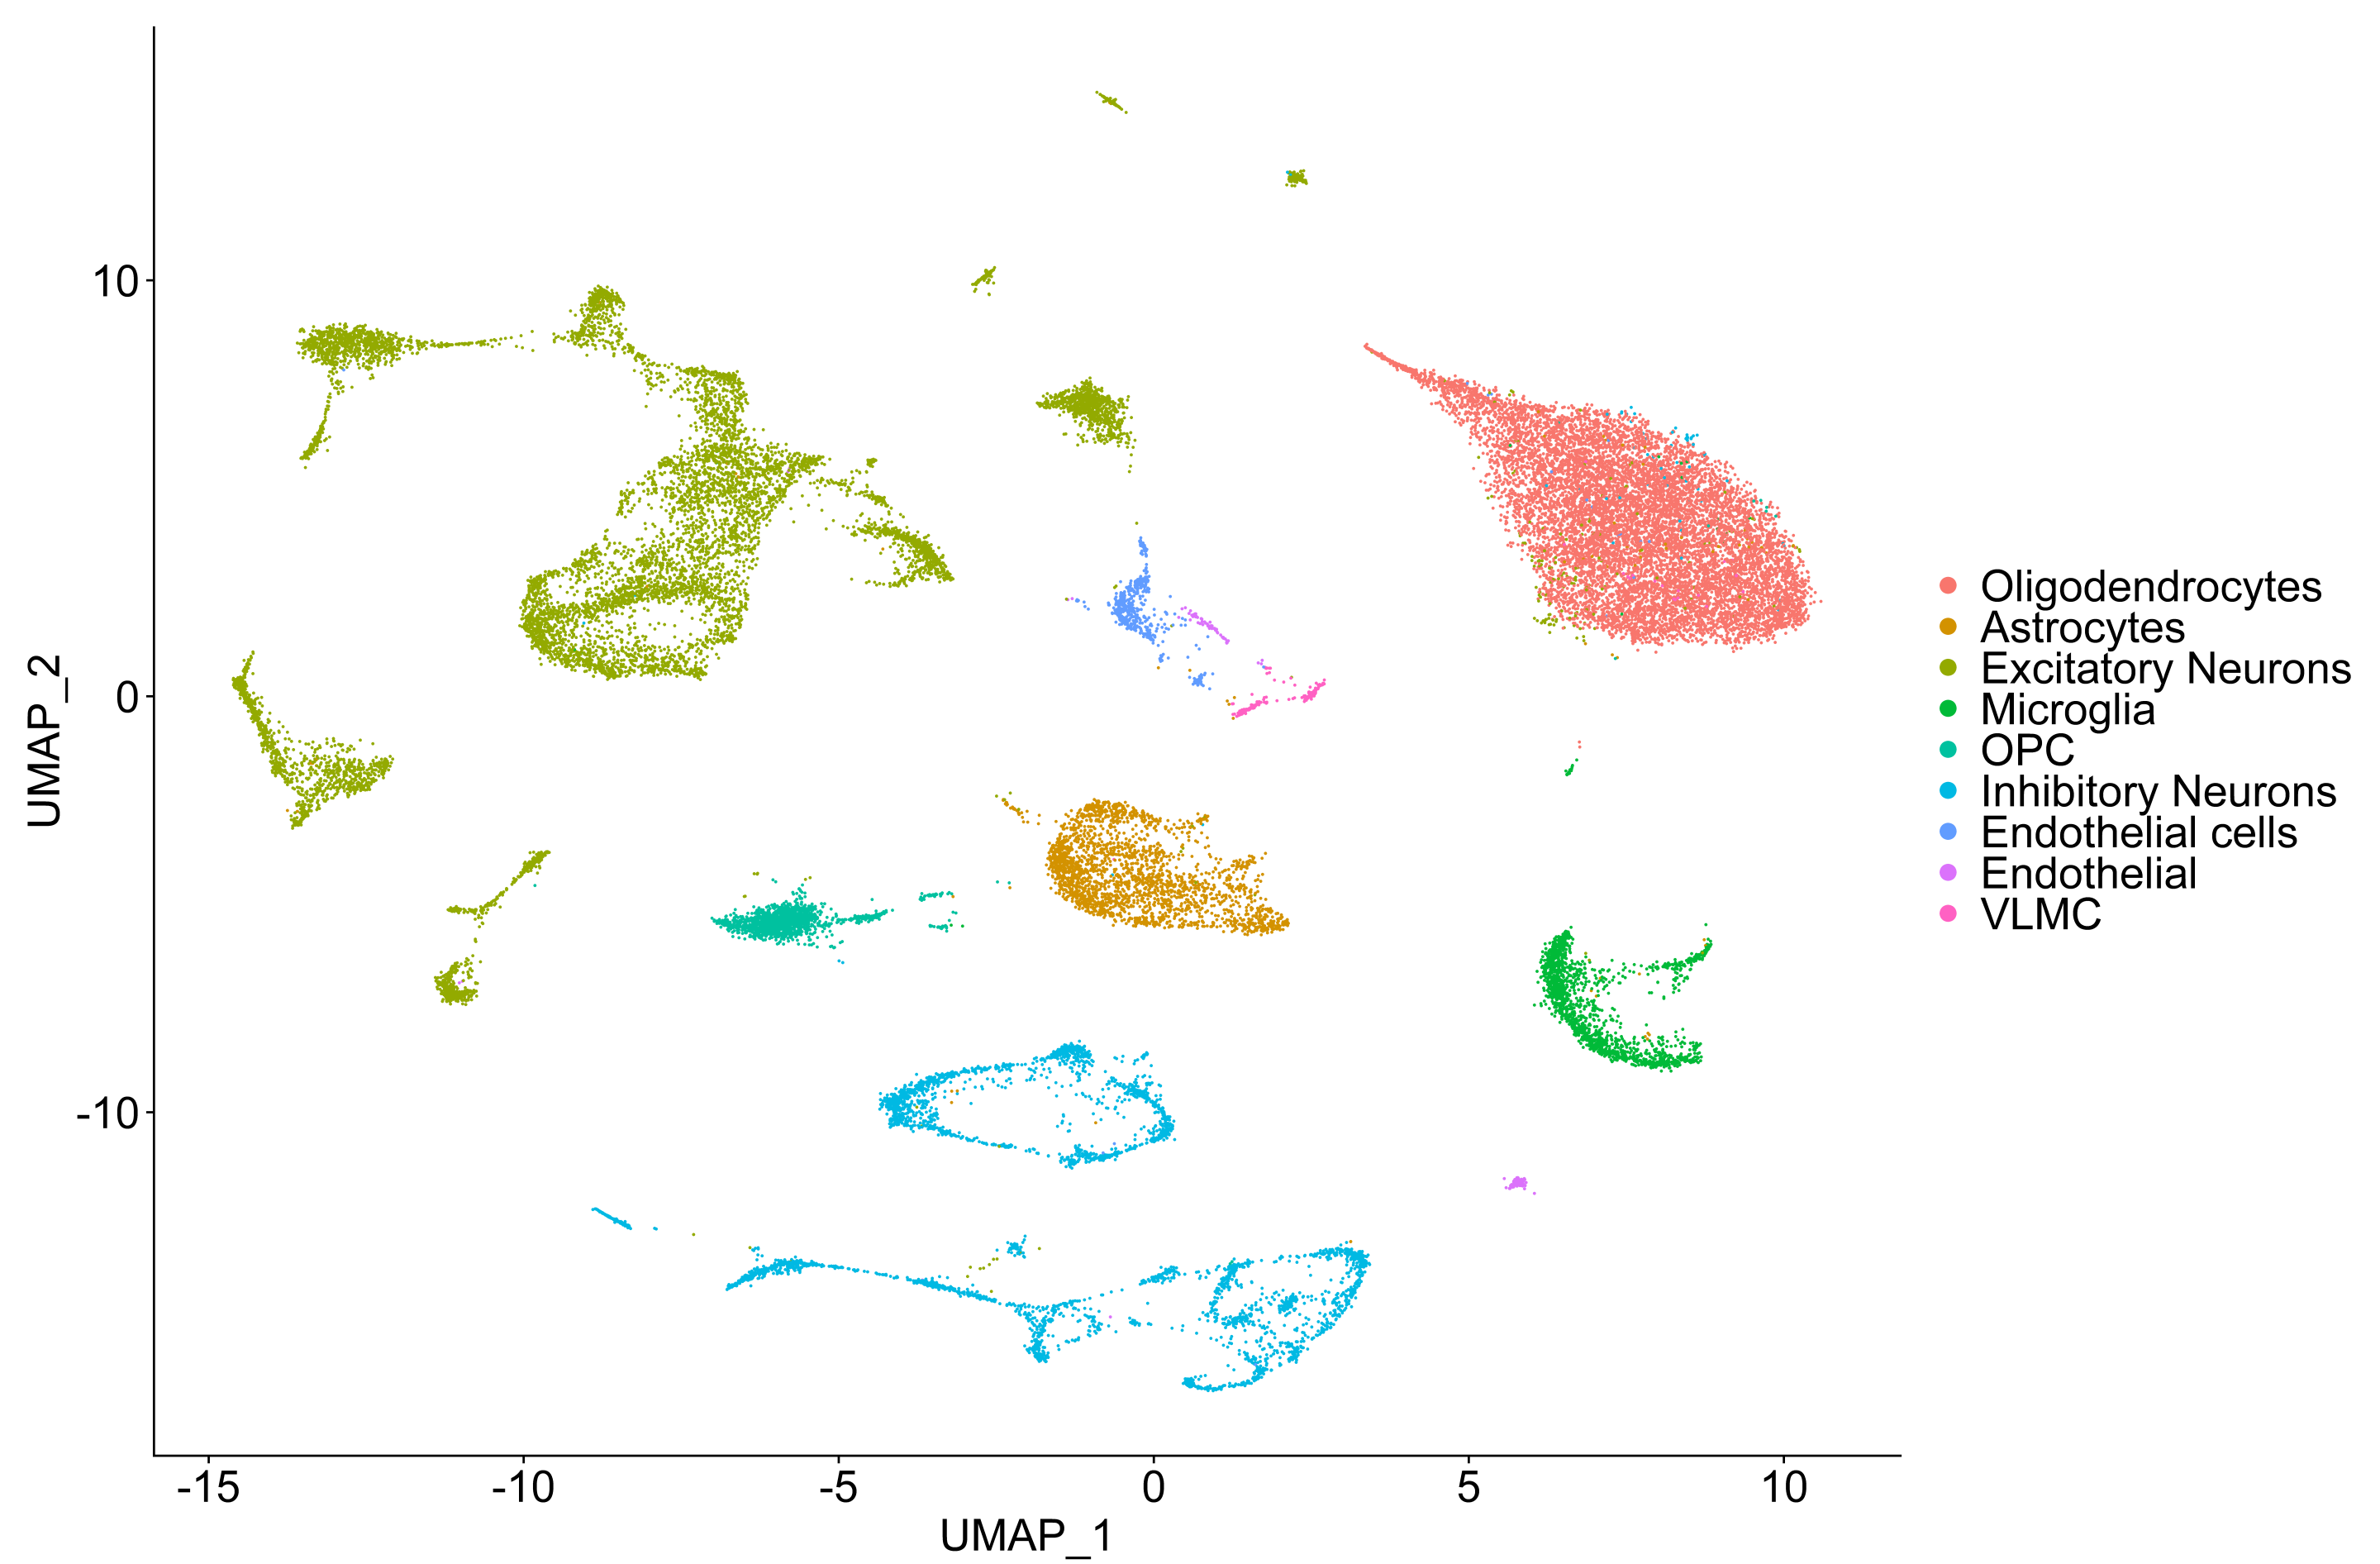

Supplement: NIHMS1657410-supplement-FIG_S4.pdf [file NIHMS1657410-supplement-FIG_S4.pdf]

AA

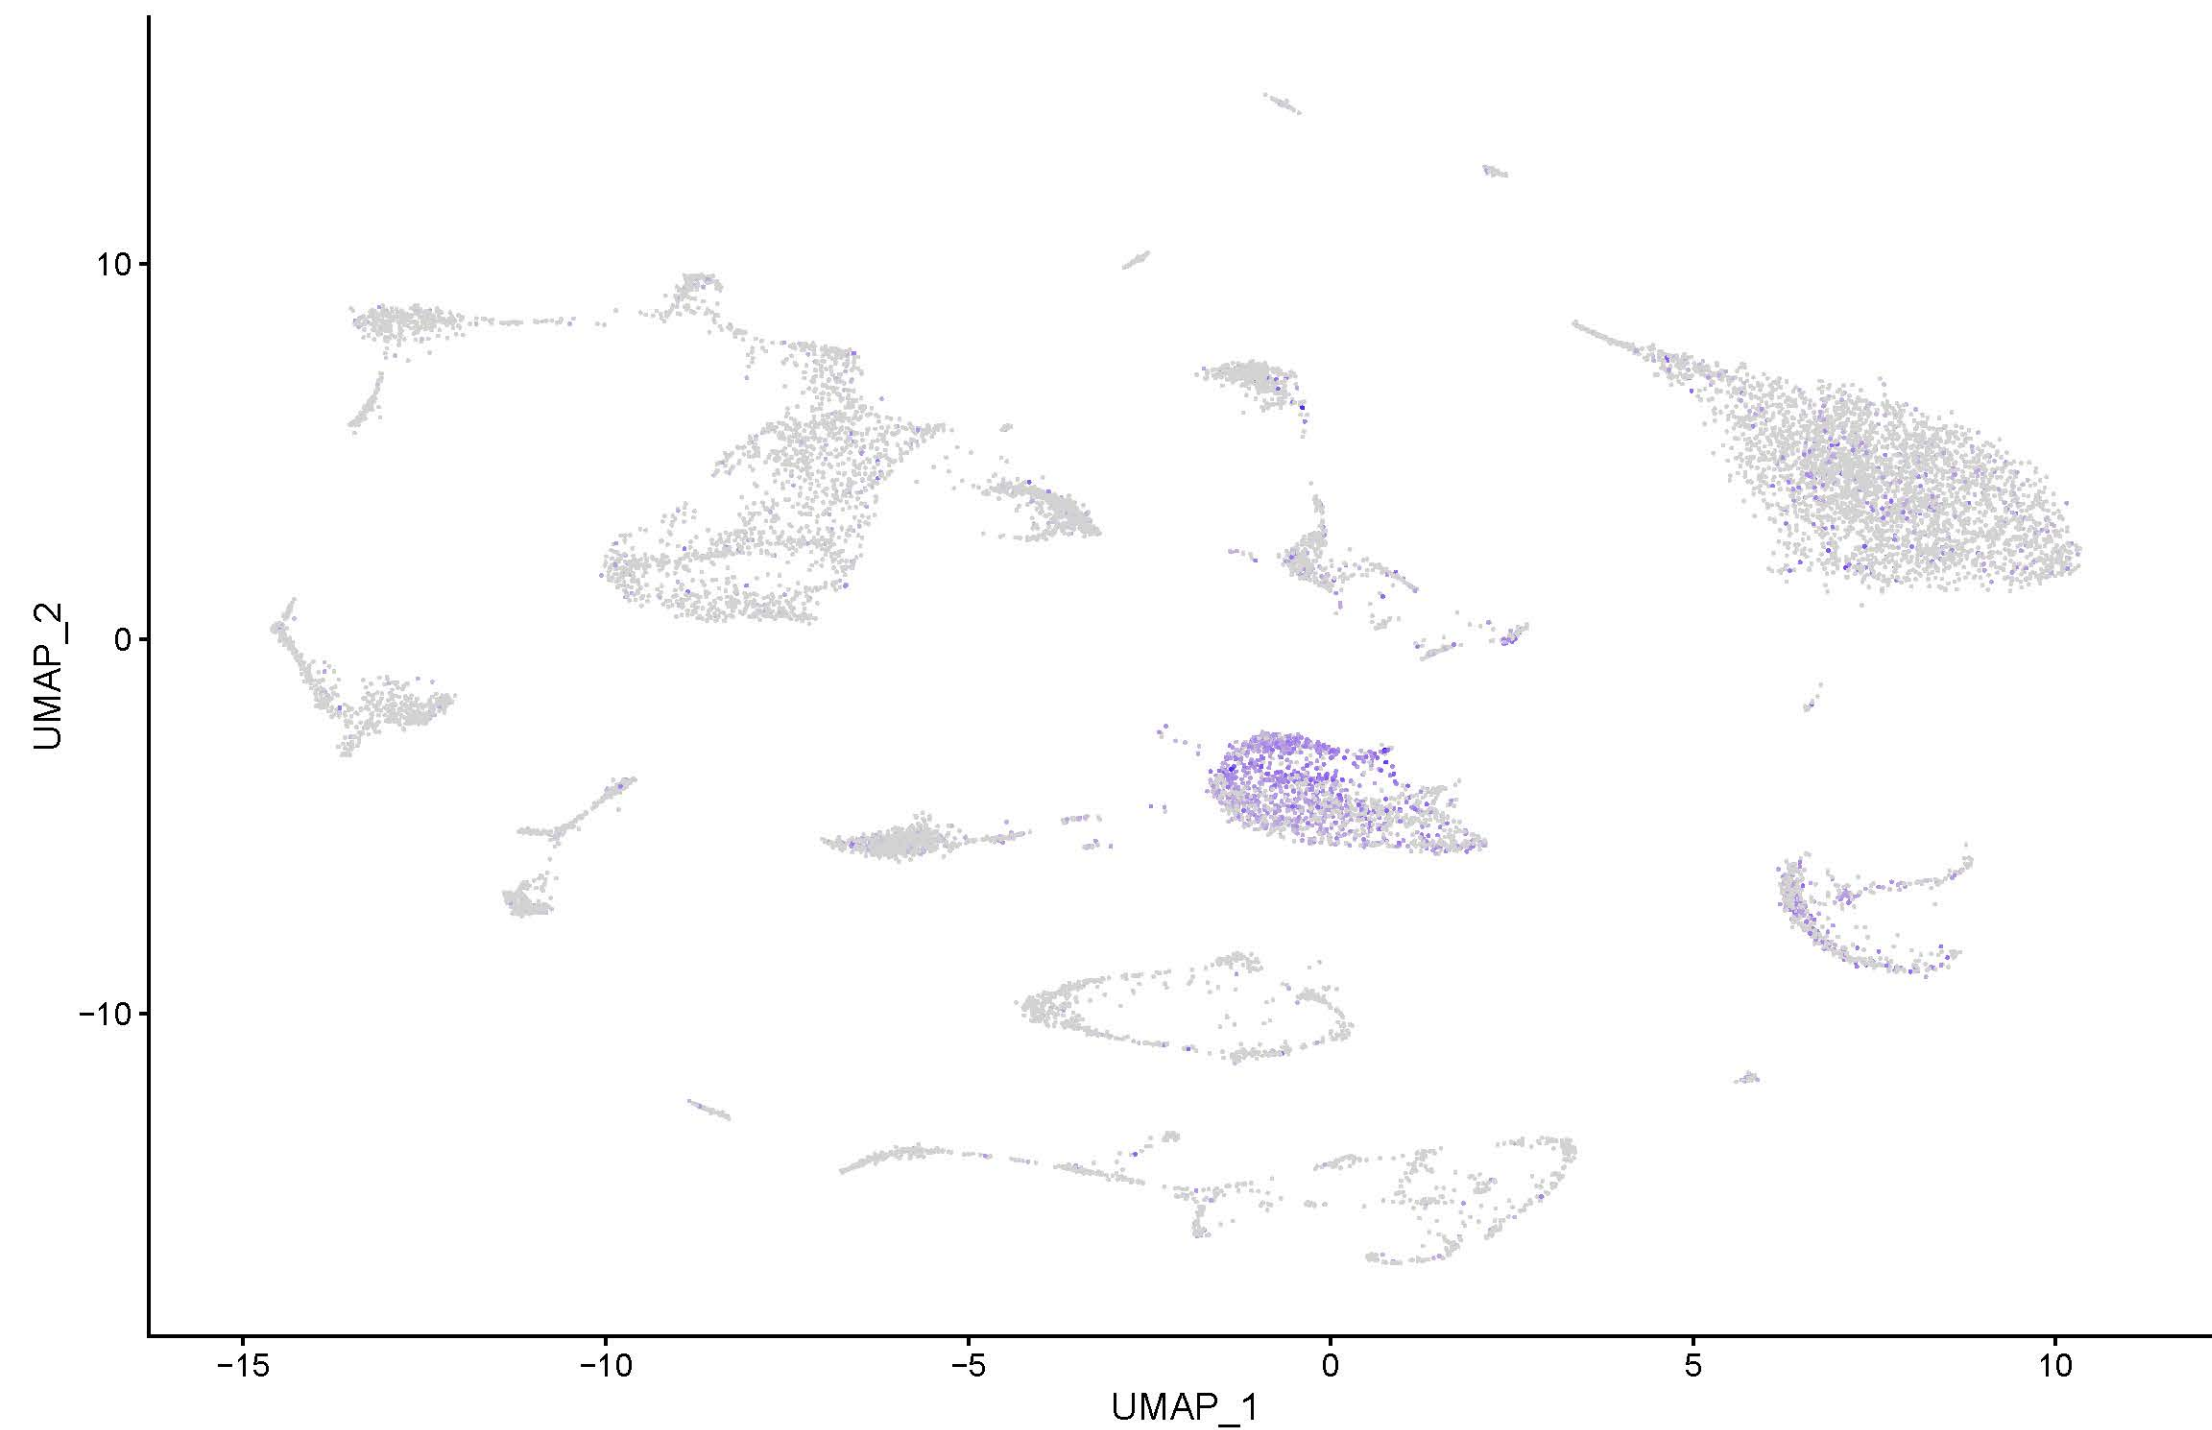

EU

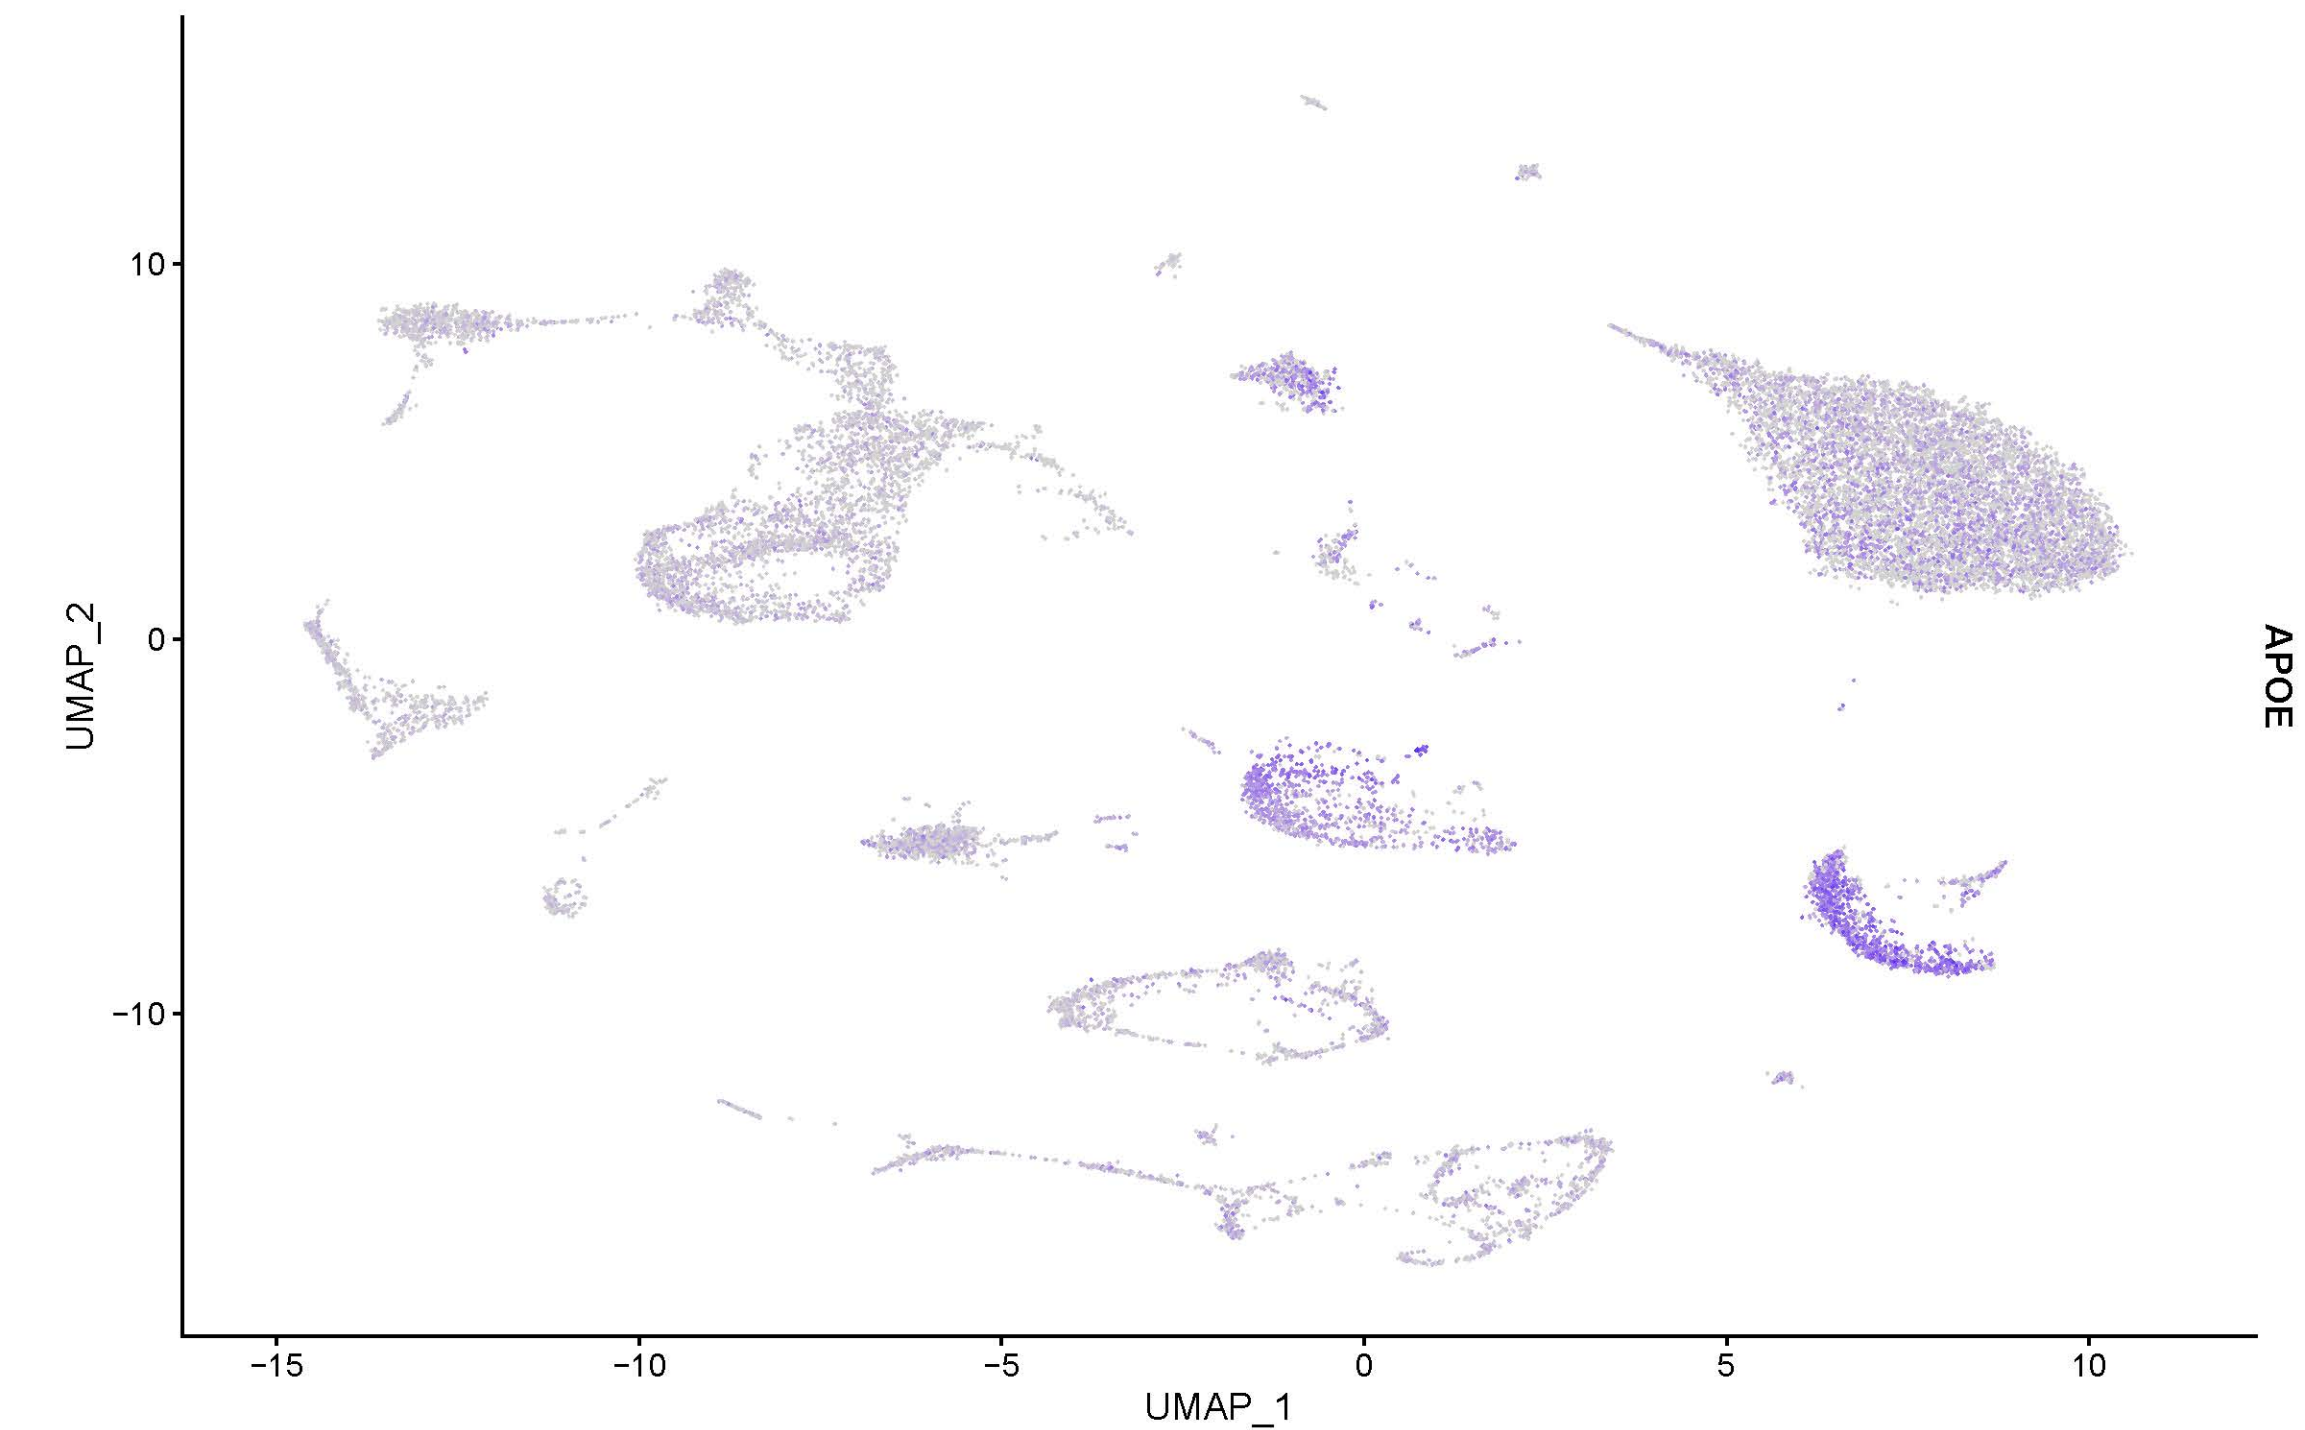

Supplement: NIHMS1657410-supplement-FIG_S5.pdf [file NIHMS1657410-supplement-FIG_S5.pdf]
